# Supplementary material
Source: publisher site journal article supplement (https://www.degruyterbrill.com/publication/isbn/9783486592696/downloadAsset/9783486592696_Buchinformation.pdf)
Supplement: Supplementary file 1 [file 9783486592696_Buchinformation.pdf]

Lesen, entdecken, verstehen.

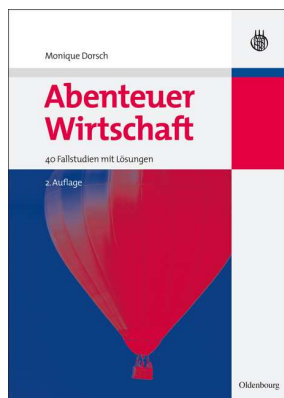

Monique Dorsch

## Abenteuer Wirtschaft

40 Fallstudien mit Lösungen

2., überarbeitete Auflage 2009  
310 Seiten | gebunden | € 34,80  
ISBN 978-3-486-59059-3

In diesem Buch fangen 40 Fallstudien Facetten von der Wirtschaft – gewissermaßen als Schnappschüsse – ein. Die Fälle gehen auf die unterschiedlichsten Bereiche der Wirtschaft zurück und beziehen sowohl betriebswirtschaftliche als auch volkswirtschaftliche Themen ein, wobei bei diesen nicht selten auch die Politik eine Rolle spielt.

Die gewählten Beispiele weisen eine hohe Komplexität auf. Geeignete Instrumente zur Analyse und Lösung solcher Problemstellungen bietet die Methodik des vernetzten Denkens. Daher wird einführend die Anwendung der diesbezüglichen Instrumente anhand eines Beispiels gezeigt.

Übersichten am Beginn des Buches zeigen, wo die Schwerpunkte jeder Fallstudie liegen. Zu jeder Fallstudie wird ein Lösungsvorschlag angeboten, der allerdings – wie bei Fallstudien üblich – nicht die einzige mögliche Lösung ist.

---

Alle Fallstudien wurden von der Autorin selbst entwickelt und beruhen nahezu ausnahmslos auf wahren Begebenheiten. Für die Studierenden bietet all dies eine Menge Herausforderungen: Auseinandersetzung mit einem breiten inhaltlichen Spektrum, das die Neugier und Lust anregen möchte, den Dingen der Realität nachzuspüren.

---

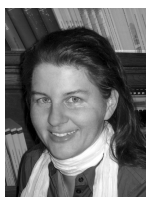

Dipl.-Kffr. Monique Dorsch lehrt an der Westsächsischen Hochschule Zwickau, Fakultät Wirtschaftswissenschaften.

[www.oldenbourg.de](http://www.oldenbourg.de)

### Pressereferat Wirtschafts- und Sozialwissenschaften

Oldenbourg Wissenschaftsverlag | Rosenheimer Str. 145 | 81671 München  
Tel.: +49 89 45051-468 | Fax: +49 89 45051-292 | [presse-wiso@oldenbourg.de](mailto:presse-wiso@oldenbourg.de)

Alle Veröffentlichungen des Oldenbourg Verlags sind über den Buchhandel zu beziehen.  
Rezensionsexemplare auf Anforderung.
